# Supplementary material for: Significantly enhanced oxygen reduction reaction performance of N-doped carbon by heterogeneous sulfur incorporation: synergistic effect between the two dopants in metal-free catalysts
Source: Royal Society of Chemistry journal article supplement (doi:10.1039/c6ta02419j), 2016-01-01
Supplement: c6ta02419j1.pdf [file c6ta02419j1.pdf]

## **Supporting Information**

### **Significantly Enhanced Oxygen Reduction Reaction Performance of N-doped Carbon by Heterogeneous Sulfur Incorporation: Synergistic Effect Between the two Dopants in Metal-free Catalysts**

Jianbing Zhu<sup>a,b</sup>, Kai Li<sup>c</sup>, Meiling Xiao<sup>a,b</sup>, Changpeng Liu<sup>d</sup>, Zhijian Wu<sup>c</sup>, Junjie Ge<sup>d\*</sup>  
and Wei Xing<sup>a,c,\*</sup>

<sup>a</sup>State Key Laboratory of Electroanalytical Chemistry, Changchun Institute of Applied Chemistry, Chinese Academy of Sciences, Changchun, Jilin, 130022, China.

<sup>b</sup>Graduate School of the Chinese Academy of Sciences, Beijing, 100039, China.

<sup>c</sup>State Key Laboratory of Rare Earth Resource Utilization, Changchun Institute of Applied Chemistry, 5625 Renmin Street, Changchun, 130022, PR China.

<sup>d</sup>Laboratory of Advanced Power Sources, Changchun Institute of Applied Chemistry, 5625 Renmin Street, Changchun, 130022, PR China.

Address: 5625 Renmin Street, Changchun 130022, PR China.

E-mail Address: [xingwei@ciac.ac.cn](mailto:xingwei@ciac.ac.cn)

Tel: +86-431-85262223

Fax: +86-431-85685653

## Experiment Section

### Chemicals

Sulfocarbamide and urea were purchased from Aladdin Company. Black Pearls ® 2000 carbon black was obtained from Cabot Corporation. 5 wt% Nafion ionomer was obtained from Aldrich. Perchloric acid was purchased from Alfa Aesar. Commercial state-of-the-art 20 wt% Pt/C (Johnson Matthey Company, HiSPEC™ 3000) was used as the benchmark for comparison and was denoted as Pt/C. H<sub>2</sub>SO<sub>4</sub>, NaNO<sub>3</sub> and KMnO<sub>4</sub> were purchased from the Shanghai Chemical Factory (Shanghai, China) and used as received without further purification. Ultrapure water (Millipore, 18.2 MΩ cm) was used throughout all experiments.

### Electrochemical Measurements

RRDE measurements were conducted by liner sweep voltammetry (LSV) from 1.1 V to 0.2 V at a scan rate of 5 mV s<sup>-1</sup> at 1600 rpm, while the ring electrode was held at 1.3 V vs. RHE. All the ORR currents presented in the figures are Faradaic currents, i.e. after correction for the capacitive current. The following equations were used to calculate *n* (the apparent number of electrons transferred during ORR) and % H<sub>2</sub>O<sub>2</sub> (the percentage of H<sub>2</sub>O<sub>2</sub> released during ORR).

$$n = \frac{4I_D}{I_D + (I_R/N)} \quad (1)$$

$$\%H_2O_2 = 100 \frac{2I_R/N}{I_D + (I_R/N)} \quad (2)$$

Where *I<sub>D</sub>* is the Faradaic current at the disk, *I<sub>R</sub>* the Faradaic current at the ring and *N* is

the H<sub>2</sub>O<sub>2</sub> collection coefficient at the ring. The kinetic current ( $I_k$ ) can be calculated by the Koutechy-Levich equation given below:

$$\frac{1}{I} = \frac{1}{I_L} + \frac{1}{I_K} \quad (3)$$

The  $I_L$  term can be obtained from the Levich equation:

$$I_L = 0.62nAF C_0 (D_0)^{2/3} \nu^{-1/6} \quad (4)$$

where  $n$  is the number of electrons transferred;  $F$  is Faraday's constant (96,485 C mol<sup>-1</sup>);  $A$  is the area of the electrode (0.196 cm<sup>2</sup>);  $D$  is the diffusion coefficient of O<sub>2</sub> in 0.1 M KOH solution (1.9×10<sup>-5</sup> cm<sup>2</sup> s<sup>-1</sup>);  $\nu$  is the kinematic viscosity of the electrolyte (1.01×10<sup>-2</sup> cm<sup>2</sup> s<sup>-1</sup>);  $\omega$  is the angular frequency of rotation,  $\omega = 2\pi f/60$ ,  $f$  is the RDE rotation rate in rpm, and  $C_0$  is the concentration of molecular oxygen in 0.1M KOH solution (1.26×10<sup>-6</sup> mol cm<sup>-3</sup>). In all figures, the potentials were converted to values versus the reversible hydrogen electrode (RHE). The conversion from SCE to RHE is done by measuring the voltage  $\Delta E$  between the SCE and a Pt-black coated Pt wire immersed in the same electrolyte saturated with H<sub>2</sub>. The measured  $\Delta E$  was 0.998 V. All experiments were carried out at about 25°C.

## Computational Details

### Model

For N doped structure, a 4×4 graphene surface with a single point defect and a benzal N atom (including 31 C and 1 N atoms) are set as the planar unit cell (9.84°A×9.84°A× 12°A) for periodic calculations in this work. For N, S co-doped carbon, the second neighbor C near the defect in N doped structure is replaced by S. The structures of N doped and N, S co-doped are shown in Figure 4a and b, respectively. The geometries are fully optimized after the molecular (O<sub>2</sub>, OOH, H<sub>2</sub>O

or OH) and O or H atom adsorbed and the most stable structures are shown in Figure S2 (for N doped) and S3 (for N, S co-doped).

### **The detail about the free energy calculation**

To investigate the effects of the electric potential on the activity and mechanisms of ORR, the free energy diagrams of ORR developed by Nørskov et al is employed<sup>1</sup>. Free energy change from initial states to final states of the reaction is calculated as follows:

$$\Delta G = \Delta E + \Delta ZEP - T\Delta S + \Delta G_U + \Delta G_{pH} + \Delta G_{field}$$

where  $\Delta E$  is the total energy change obtained from DFT calculations,  $\Delta ZEP$  is the change in zero-point energy,  $T$  is the temperature (298.15 K), and the  $\Delta S$  is the change in entropy.  $\Delta G_U = -eU$ , where  $U$  is the electrode potential with respect to standard hydrogen electrode, and  $e$  is the transferred charge.  $\Delta G_{pH} = k_B T \ln 10 \times pH$  where  $k_B$  is the Boltzmann constant, and pH=14 for alkaline medium.<sup>2, 3</sup>  $\Delta G_{field}$  is the free energy correction due to the electrochemical double layer and is neglected as in previous studies.<sup>1, 4</sup> Gas-phase H<sub>2</sub>O at 0.035 bar was used as the reference state, since at this pressure, the gas-phase H<sub>2</sub>O is in equilibrium with liquid water at 298.15 K. The entropies of the ORR intermediates were calculated from the vibrational frequencies.

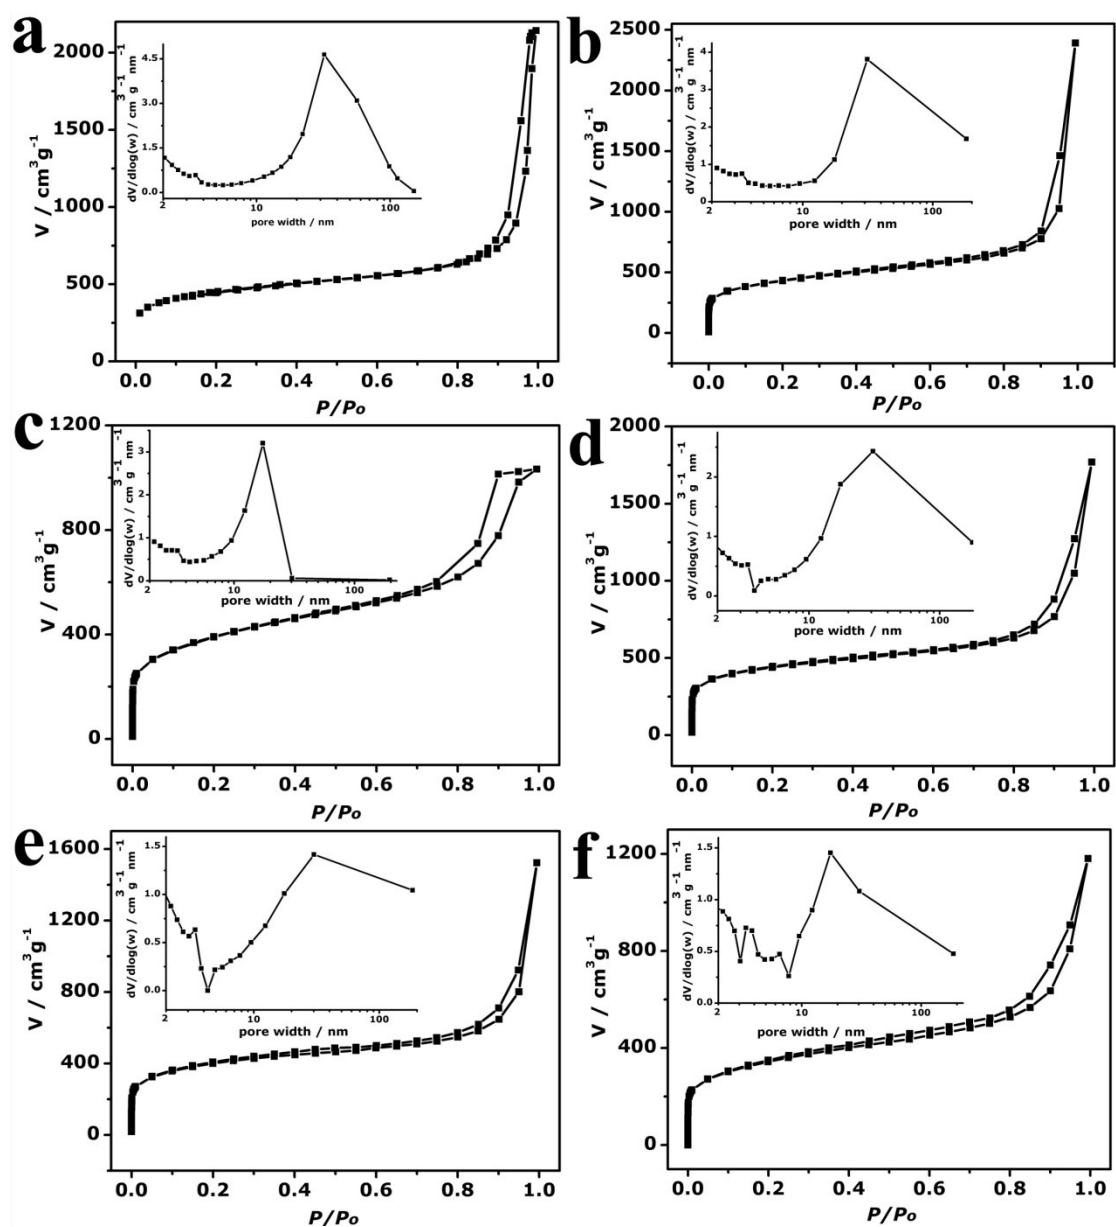

**Figure S1** Desorption isotherms of sample obtained with different condition, insert the corresponding pore size distribution curves calculated from the desorption branches; (a) BP, (b) BP-900, (c) OBP-900, (d) N,S-BP-30, (e) N-OBP-30, (f) N,S-OBP-30.

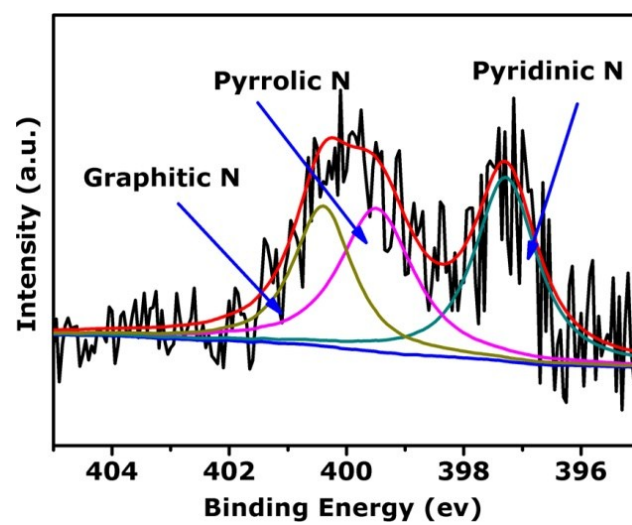

**Figure S2** High resolution XPS spectra of N 1s of N-OBP-30.

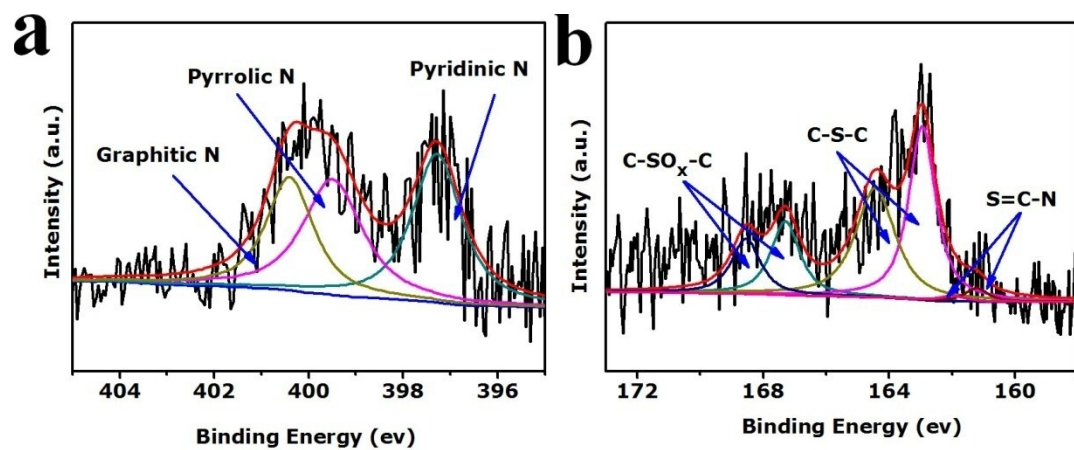

**Figure S3** High resolution XPS spectra of N 1s (a) and S 2p (b) of N,S-BP-30.

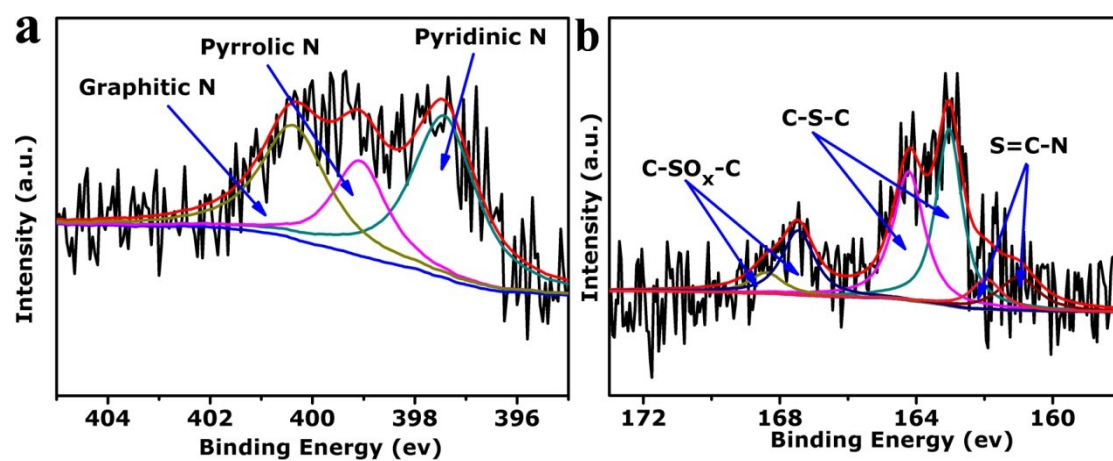

**Figure S4** High resolution XPS spectra of N 1s (a) and S 2p (b) of N,S-OBP-30.



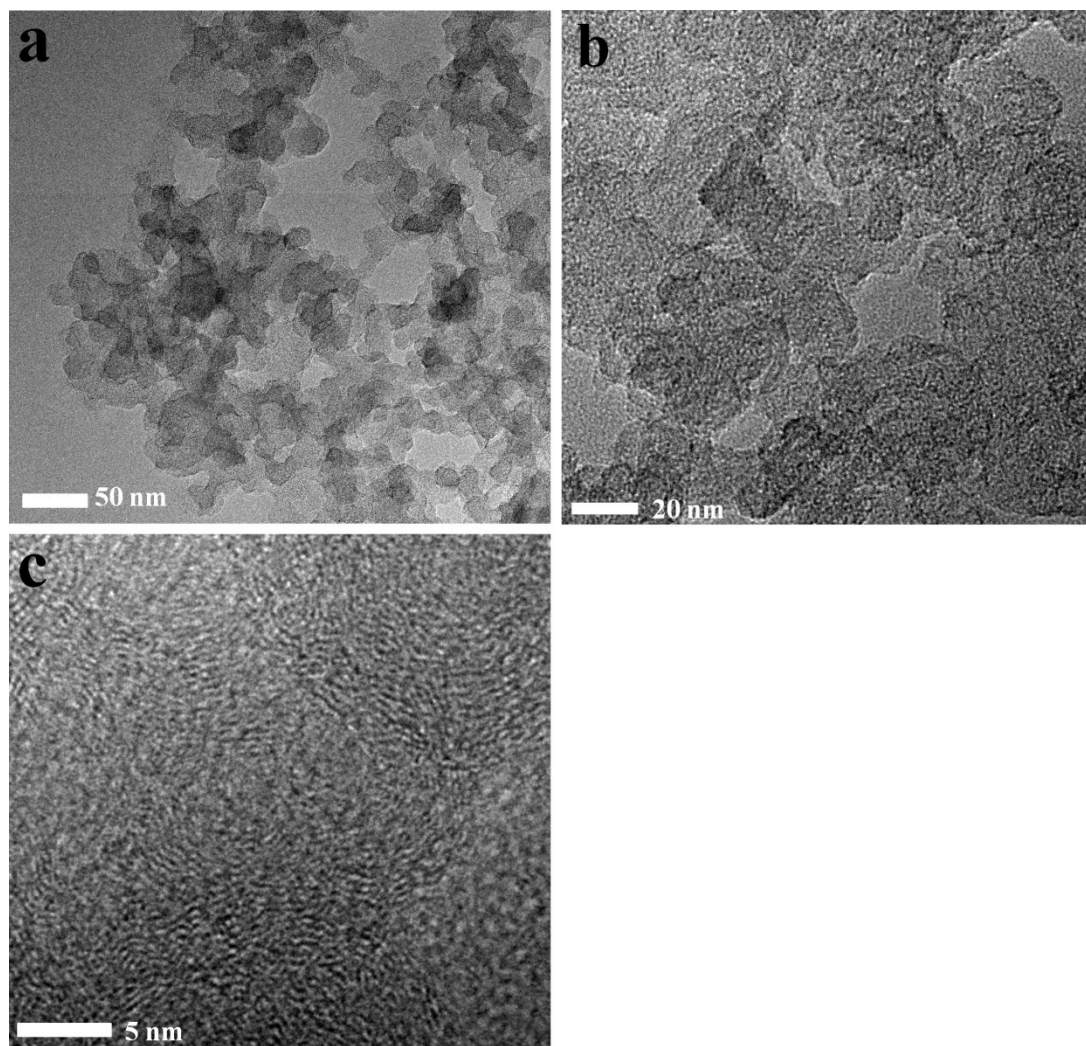

**Figure S5** Typical TEM images for OBP-900 with different magnification.

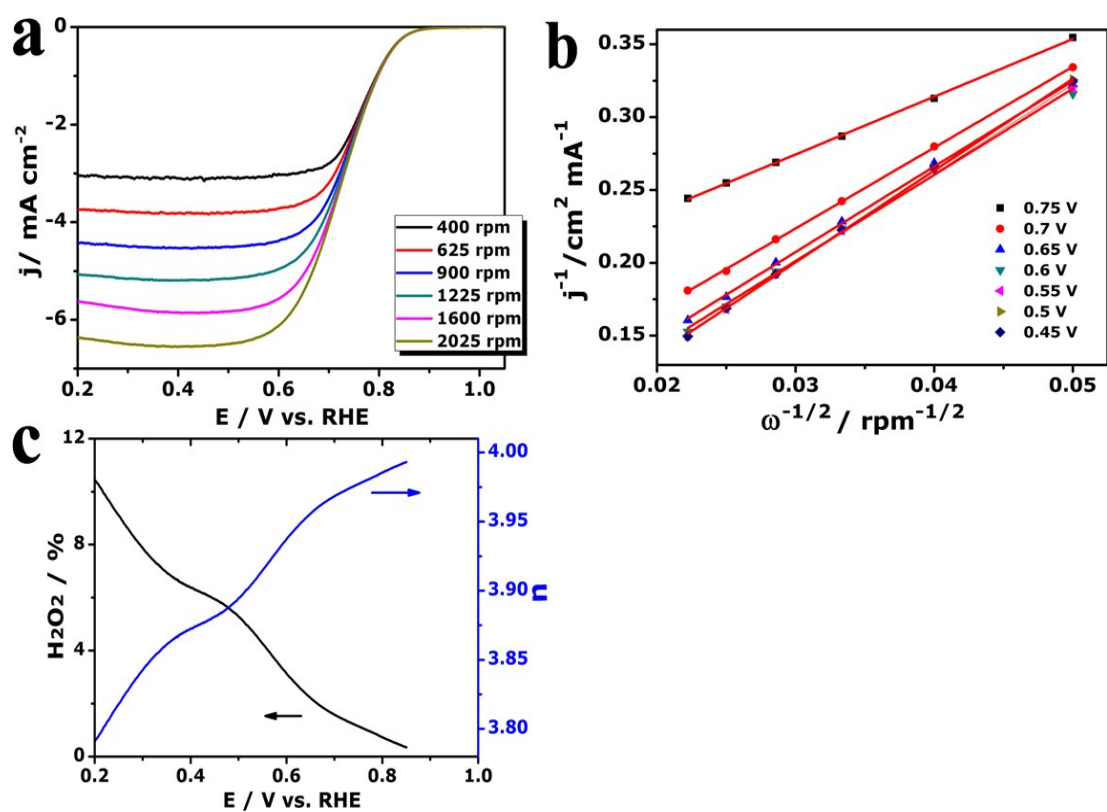

**Figure S6** (a) Linear sweep voltammograms (LSV) for oxygen reduction on the N,S-BP-30 catalyst in O<sub>2</sub>-saturated 0.1 M KOH at various rotation speeds with a scan rate of 5 mV/s. (b) Corresponding Koutecky–Levich (K-L) plots, (c) peroxide yield and corresponding electron transfer number of N,S-BP-30.

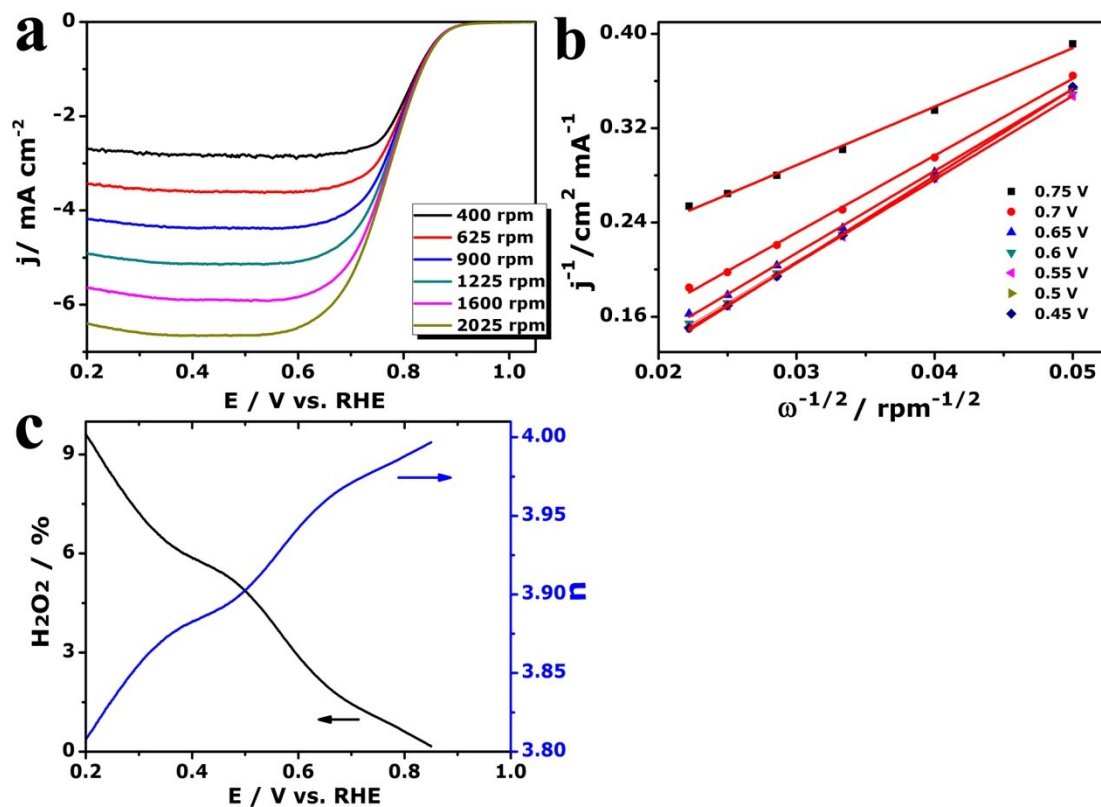

**Figure S7** (a) Linear sweep voltammograms (LSV) for oxygen reduction on the N-OBP-30 catalyst in O<sub>2</sub>-saturated 0.1 M KOH at various rotation speeds with a scan rate of 5 mV/s. (b) Corresponding Koutecky–Levich (K-L) plots, (c) peroxide yield and corresponding electron transfer number of N-OBP-30.

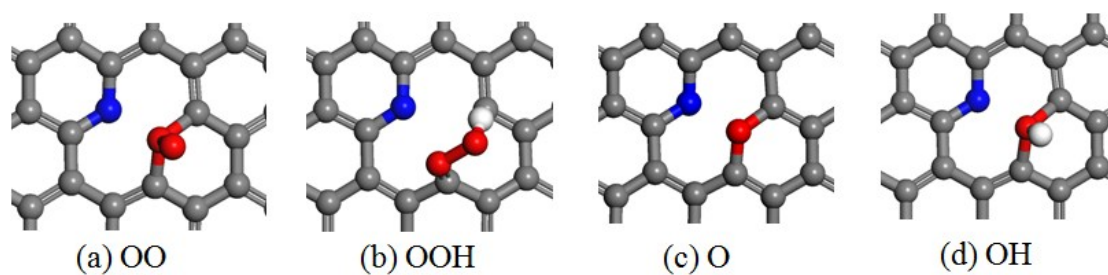

**Figure S8** The stable structures of intermediates involved in ORR adsorption on N doped carbon structure. The red and white balls denote the O and H atoms, respectively.

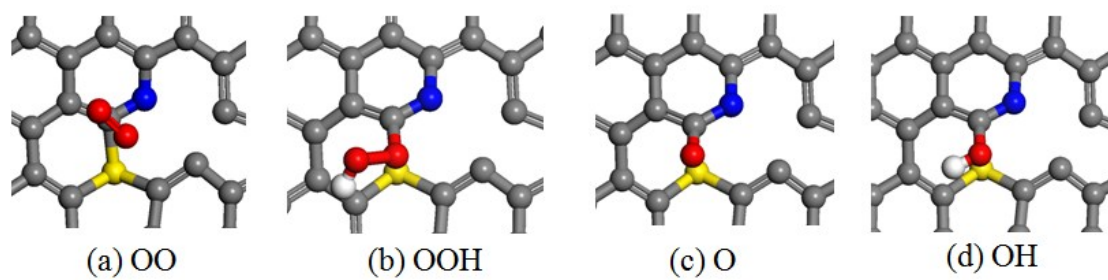

**Figure S9** The stable structures of intermediates involved in ORR adsorption on N, S co-doped carbon structure.

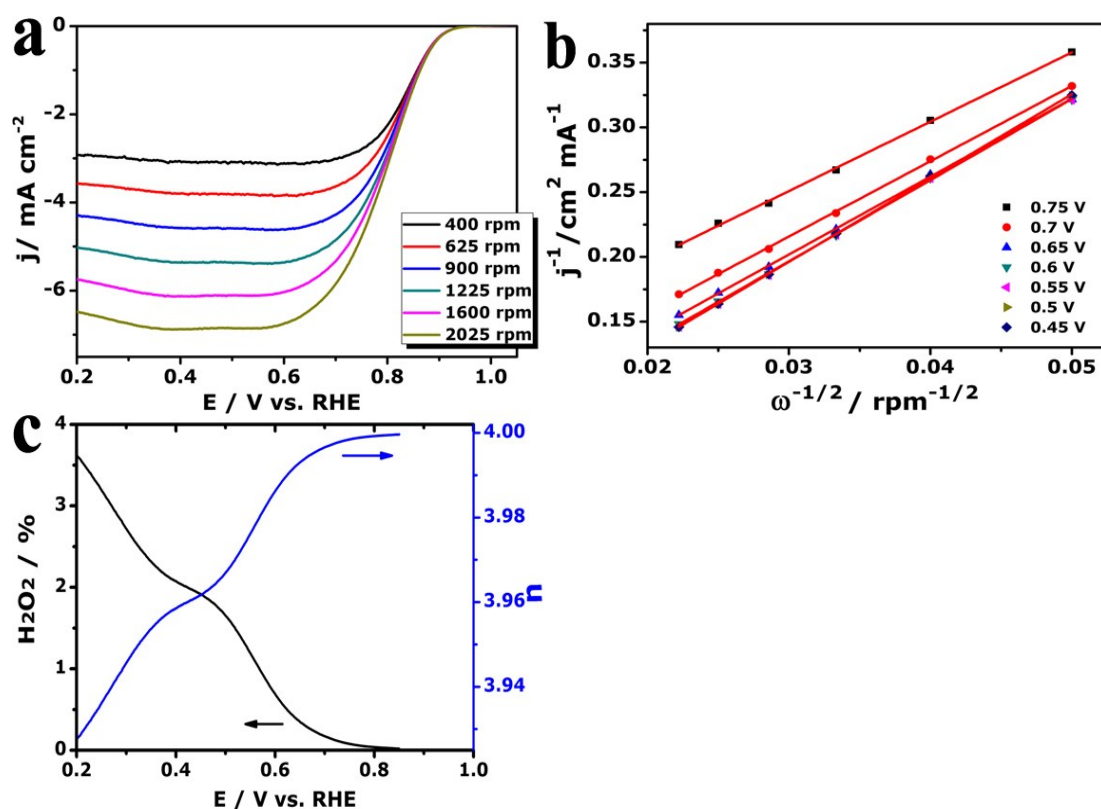

**Figure S10** (a) Linear sweep voltammograms (LSV) for oxygen reduction on the N,S-OBP-10 catalyst in O<sub>2</sub>-saturated 0.1 M KOH at various rotation speeds with a scan rate of 5 mV/s. (b) Corresponding Koutecky–Levich (K-L) plots, (c) peroxide yield and corresponding electron transfer number of N,S-OBP-10.

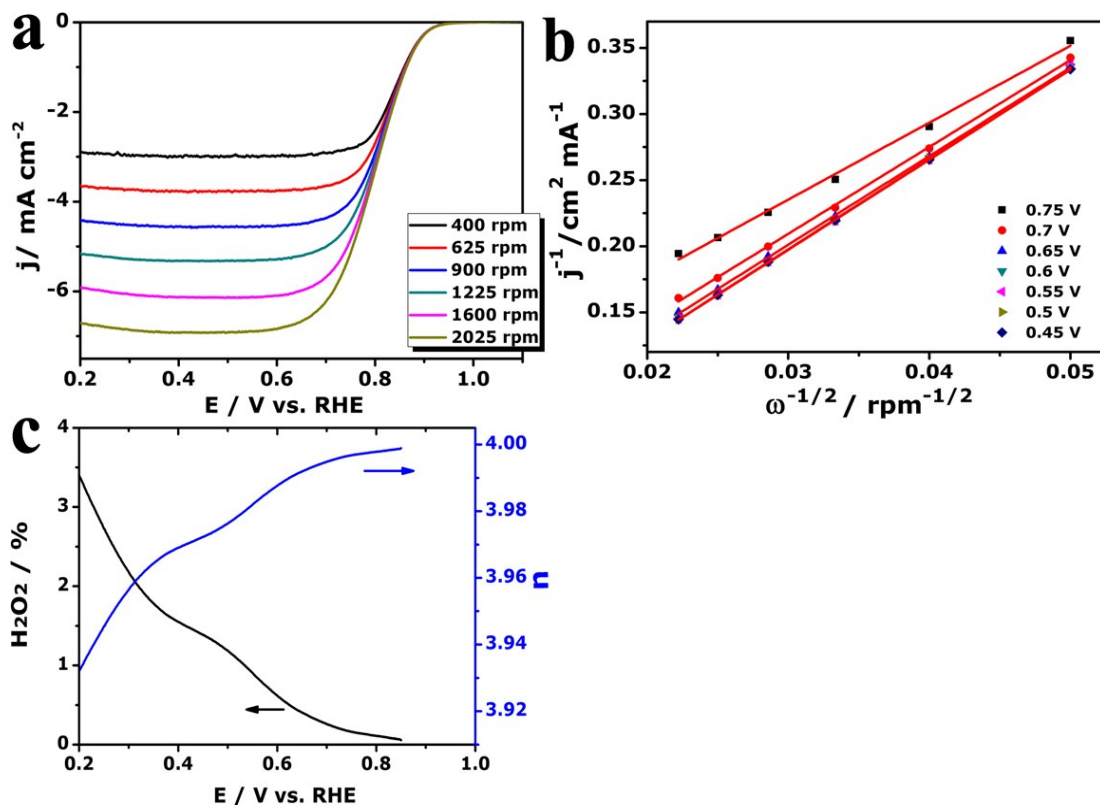

**Figure S11** (a) Linear sweep voltammograms (LSV) for oxygen reduction on the N,S-OBP-20 catalyst in O<sub>2</sub>-saturated 0.1 M KOH at various rotation speeds with a scan rate of 5 mV/s. (b) Corresponding Koutecky–Levich (K-L) plots, (c) peroxide yield and corresponding electron transfer number of N,S-OBP-20.

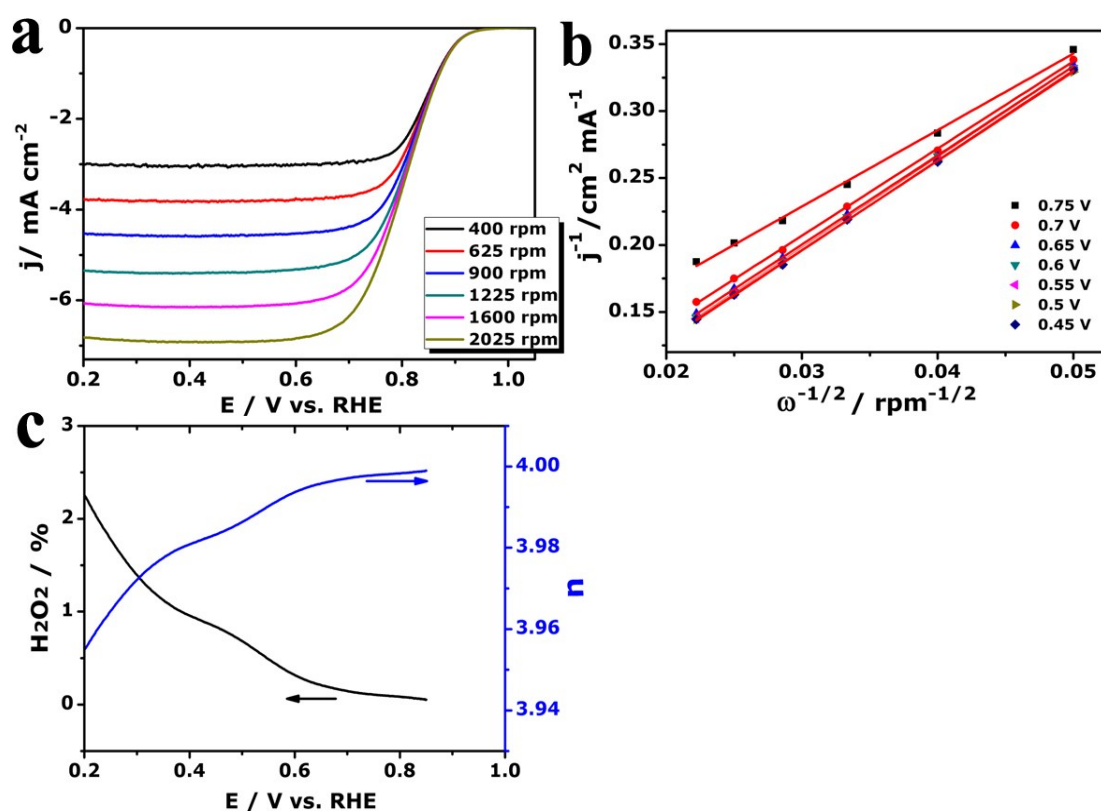

**Figure S12** (a) Linear sweep voltammograms (LSV) for oxygen reduction on the N,S-OBP-40 catalyst in O<sub>2</sub>-saturated 0.1 M KOH at various rotation speeds with a scan rate of 5 mV/s. (b) Corresponding Koutecky–Levich (K-L) plots, (c) peroxide yield and corresponding electron transfer number of N,S-OBP-40.



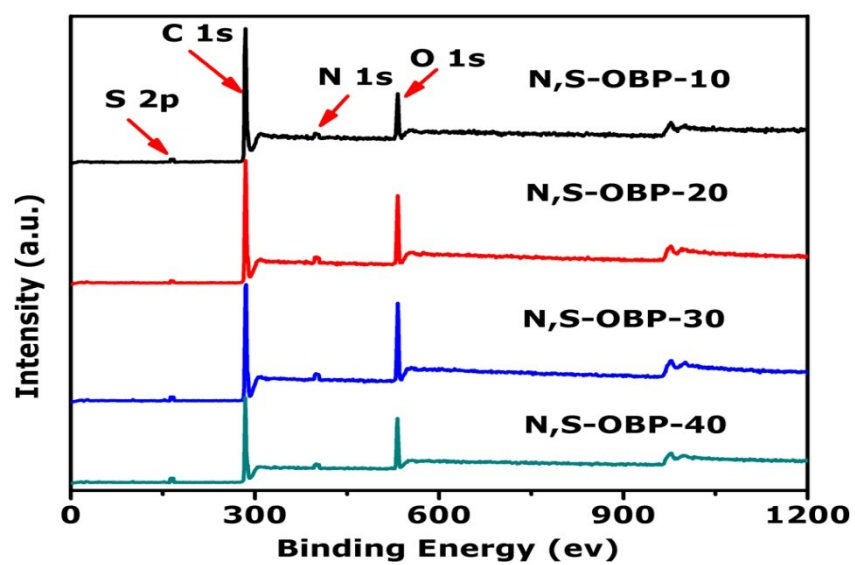

**Figure S13** XPS survey spectra of N,S-OBP materials synthesized with different sulfourea/OBP ratio.

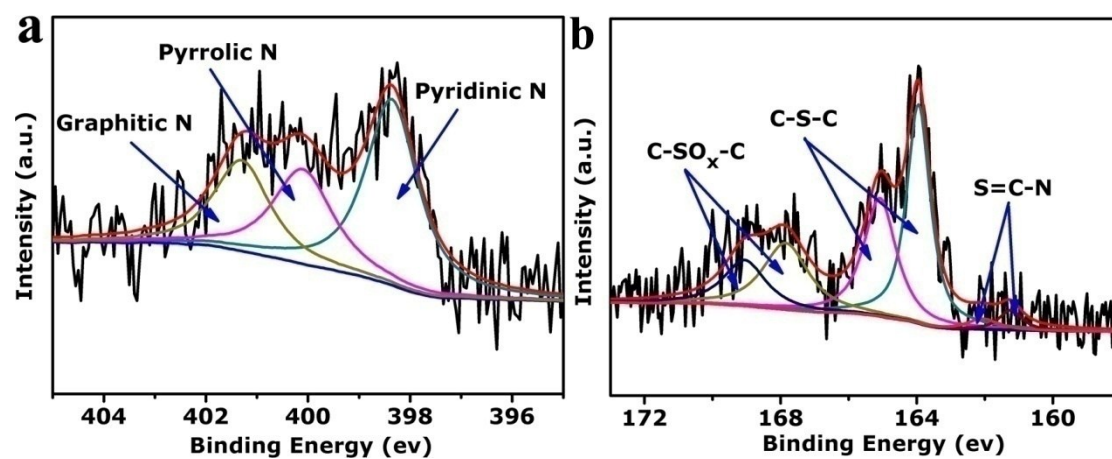

**Figure S14** High resolution XPS spectra of N 1s (a) and S 2p (b) of N,S-OBP-10.

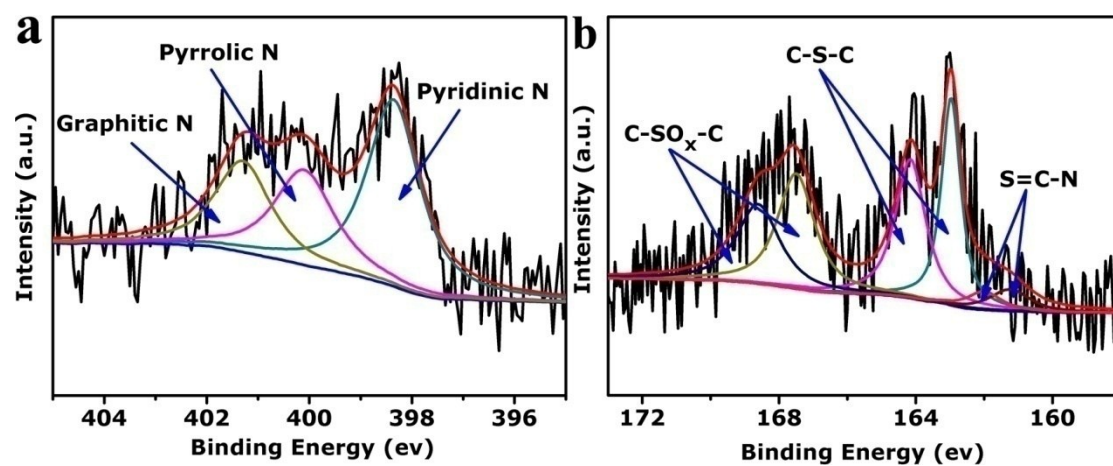

**Figure S15** High resolution XPS spectra of N 1s (a) and S 2p (b) of N,S-OBP-20.

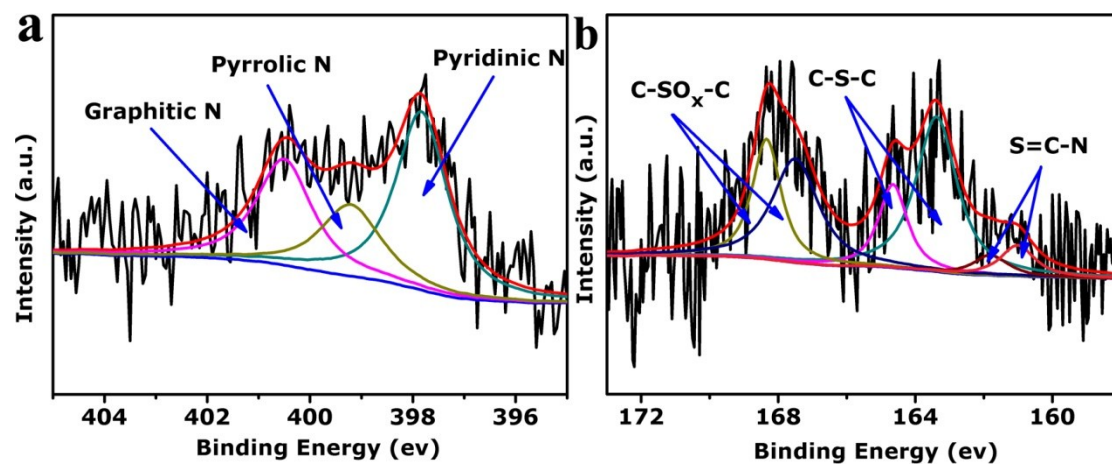

**Figure S16** High resolution XPS spectra of N 1s (a) and S 2p (b) of N, S-OBP-40.

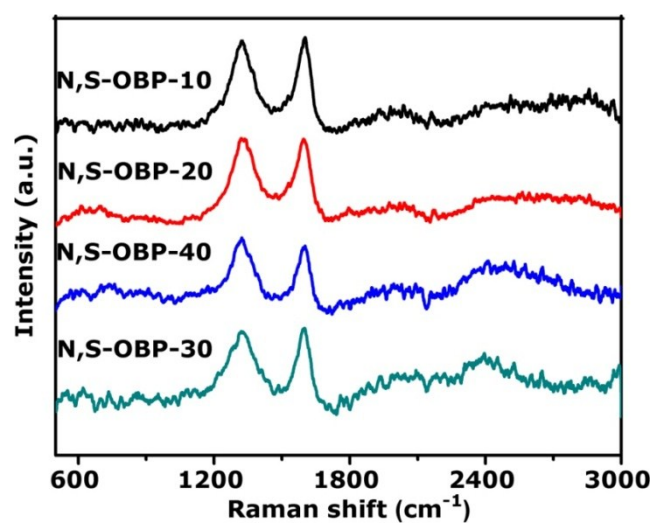

**Figure S17** Raman spectra of N,S-OBP materials synthesized with different sulfoarea/OBP ratio.

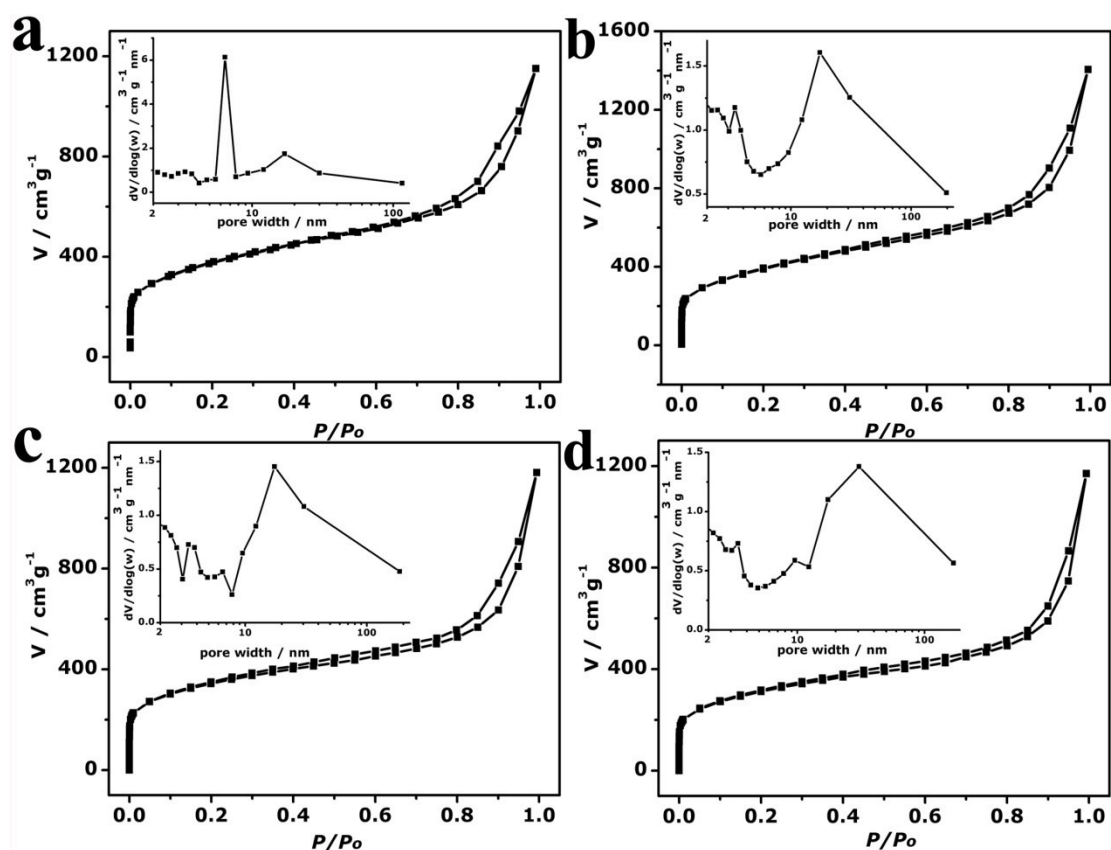

**Figure S18** Desorption isotherms of N,S-OBP materials synthesized with different sulfourea/OBP ratio, insert the corresponding pore size distribution curves calculated from the desorption branches; (a) N,S-OBP-10, (b) N,S-OBP-20, (c) N,S-OBP-30, (d) N,S-OBP-30.

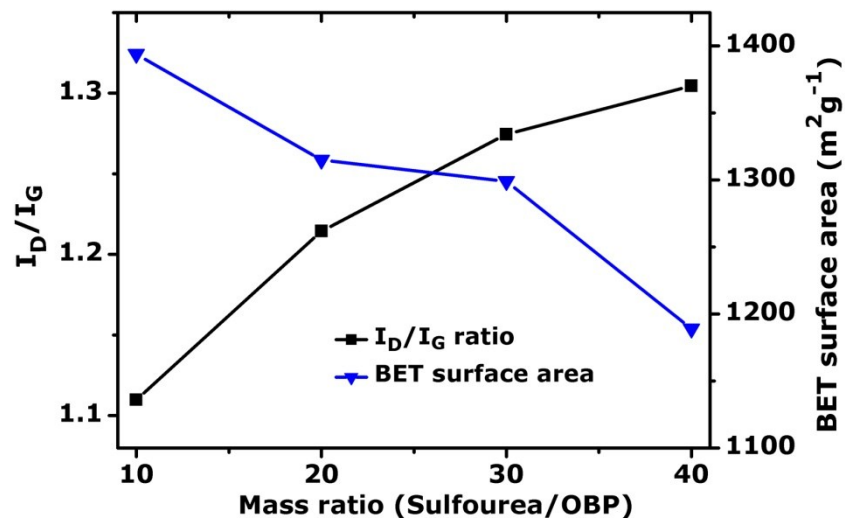

**Figure S19** Comparison of  $I_D/I_G$  ratio and BET surface area among N, S-OBP-X materials as a function of the sulfoarea/OBP ratio.

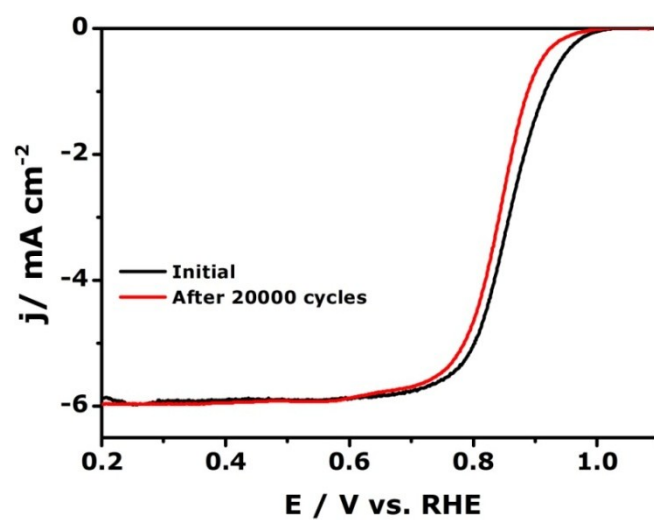

**Figure S20** RDE polarization curves for oxygen reduction on Pt/C catalyst at 1600 rpm in O<sub>2</sub>-saturated 0.1 M KOH at scan rate of 5 mV s<sup>-1</sup> before and after 20,000 cycles test.



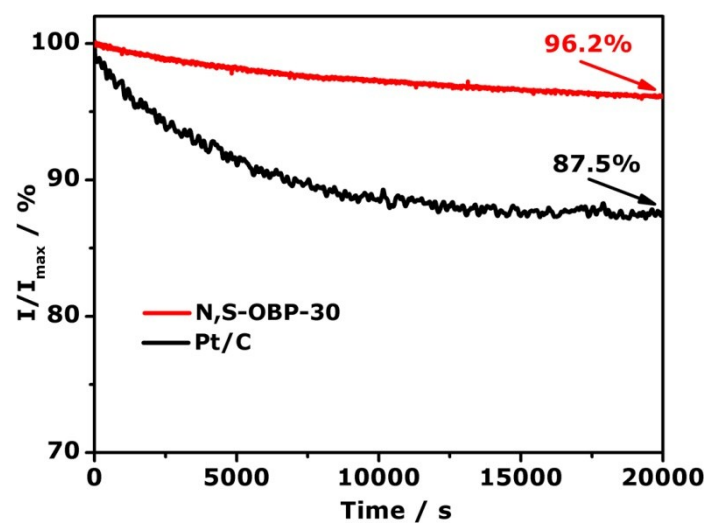

**Figure S21** Chronoamperometric measurement of N,S-OBP-30 and Pt/C catalysts at 1600 rpm in O<sub>2</sub>-saturated solution 0.1 M KOH, the potential is held at 0.8V.

**Table S1** The element composition for the synthesized catalysts

| Sample            | atomic content / % |                |                |                |                |                |
|-------------------|--------------------|----------------|----------------|----------------|----------------|----------------|
|                   | C <sup>a</sup>     | O <sup>a</sup> | N <sup>a</sup> | S <sup>a</sup> | N <sup>b</sup> | S <sup>b</sup> |
| <b>BP-900</b>     | 96.68              | 3.32           | NA             | NA             | 0.21           | 0.22           |
| <b>OBP-900</b>    | 95.84              | 4.12           | NA             | NA             | 0.25           | 0.21           |
| <b>N, S-BP-30</b> | 91.58              | 6.5            | 1.13           | 0.79           | 1.30           | 0.93           |
| <b>N-OBP-30</b>   | 92.3               | 5.07           | 2.63           | NA             | 2.94           | 0.21           |
| <b>N,S-OBP-30</b> | 88.81              | 5.69           | 3.82           | 1.68           | 4.13           | 1.98           |
| <b>N,S-OBP-10</b> | 91.07              | 5.71           | 3.22           | 1.18           | 3.39           | 1.36           |
| <b>N,S-OBP-20</b> | 90.13              | 6.46           | 3.31           | 1.31           | 3.52           | 1.46           |
| <b>N,S-OBP-40</b> | 86.85              | 6.31           | 4.67           | 2.17           | 5.28           | 2.41           |

<sup>a</sup> From XPS result; <sup>b</sup> from elemental analyses

**Table S2** BET surfaces area, BJH adsorption main pore size and pore volume for catalysts synthesized at different conditions.

| Samples           | BET surfaces area / m <sup>2</sup> g <sup>-1</sup> | Pore size / nm | Pore Volume / cm <sup>3</sup> g <sup>-1</sup> |
|-------------------|----------------------------------------------------|----------------|-----------------------------------------------|
| <b>BP-900</b>     | 1529                                               | 31.7           | 3.700                                         |
| <b>OBP-900</b>    | 1374                                               | 17.4           | 1.598                                         |
| <b>N, S-BP-30</b> | 1575                                               | 31.1           | 2.737                                         |
| <b>N-OBP-30</b>   | 1427                                               | 30.3           | 2.356                                         |
| <b>N,S-OBP-30</b> | 1212                                               | 17.3           | 1.827                                         |
| <b>N,S-OBP-10</b> | 1394                                               | 6.4            | 1.781                                         |
| <b>N,S-OBP-20</b> | 1315                                               | 17.5           | 2.174                                         |
| <b>N,S-OBP-40</b> | 1189                                               | 30.8           | 1.810                                         |

**Table S3** The content and type of nitrogen and sulfur of the synthesized samples

| Sample            | atomic content / % |                |               |                |         |                      |       |       |
|-------------------|--------------------|----------------|---------------|----------------|---------|----------------------|-------|-------|
|                   | Total N            | pyridinic<br>N | pyrrolic<br>N | graphitic<br>N | Total S | C-SO <sub>x</sub> -C | C-S-C | S=C-N |
| <b>N, S-BP-30</b> | 1.13               | 0.426          | 0.5330.       | 0.209          | 0.79    | 0.222                | 0.540 | 0.028 |
| <b>N-OBP-30</b>   | 2.63               | 1.034          | 0.534         | 1.062          | -       | -                    | -     | -     |
| <b>N,S-OBP-30</b> | 3.82               | 1.724          | 0.649         | 1.347          | 1.68    | 0.344                | 1.057 | 0.279 |
| <b>N,S-OBP-10</b> | 3.22               | 1.542          | 0.990         | 0.688          | 1.18    | 0.398                | 0.719 | 0.063 |
| <b>N,S-OBP-20</b> | 3.31               | 1.549          | 0.716         | 1.045          | 1.31    | 0.576                | 0.621 | 0.113 |
| <b>N,S-OBP-40</b> | 4.67               | 2.134          | 1.043         | 1.414          | 2.17    | 0.594                | 1.01  | 0.203 |

## Reference

1. J. K. Nørskov, J. Rossmeisl, A. Logadottir, L. Lindqvist, J. R. Kitchin, T. Bligaard and H. Jonsson, *The Journal of Physical Chemistry B*, 2004, **108**, 17886-17892.
2. S. Kattel, P. Atanassov and B. Kiefer, *The Journal of Physical Chemistry C*, 2012, **116**, 17378-17383.
3. L. Yu, X. Pan, X. Cao, P. Hu and X. Bao, *Journal of Catalysis*, 2011, **282**, 183-190.
4. S. Zuluaga and S. Stolbov, *The Journal of chemical physics*, 2011, **135**, 134702.
